# Supplementary material for: Behavior of Pigs Reared in Enriched Environment: Alternatives to Extend Pigs Attention
Source: PLoS One. 2017 Jan 6;12(1):e0168427. doi: 10.1371/journal.pone.0168427 (PMC5218552; doi:10.1371/journal.pone.0168427)
Supplement: S3 File — (XLSX) [file pone.0168427.s003.xlsx]

## Sheet: 1
				Days
		Behaviors		1	2	3	4	5	6	Average
			SL	81.8063	87.5764	84.9761	87.1372	78.9305	88.667	84.8489	No reward
			IO	7.54536	2.56188	5.12375	4.33216	3.60399	2.51845	4.28093
			SB	0.217108	0.217108	0.173686	0.303951	0	0.110265	0.170353
			AB	0.521059	0.303951	0.0868432	0.303951	0.477638	0.0434216	0.289477
			ED	5.47112	5.21059	3.64742	4.2119	9.94355	3.77768	5.37704
			IP	0.02342	0.018885	0.018974	0.02248	0.021369	0.020158	0.020881
			NE	3.68084	3.72426	5.15717	3.30004	4.50585	3.99479	4.06049
			MS	0.738168	0.390795	0.825011	0.390795	2.51845	0.868432	0.955276
			SL	59.1837	87.4946	66.6956	87.2775	83.7603	84.7924	78.2007	Difficult reward
			IO	9.46591	2.86583	2.6053	2.6053	3.47373	1.25223	3.71138
			SB	0	0.173686	0	0	0	0.173686	0.0578955
			AB	0.0868432	0.173686	0	0	0	0.173686	0.0723694
			ED	19.4963	6.60009	14.112	7.59178	8.81459	10.0304	11.1075
			IP	0.020158	0.018596	0.019855	0.024158	0.022325	0.019587	0.0207798
			NE	9.0207	2.11766	15.6305	2.46103	3.41531	3.12636	5.96192
			MS	2.73556	0.564481	0.955276	0.0434216	0.521059	0.434216	0.875669
			SL	60.1824	61.0942	64.9517	55.396	81.5024	76.716	66.6405	Effortless reward
			IO	8.4138	3.11636	1.78029	2.07524	3.60399	8.38037	4.56167
			SB	0.173686	0	0	0	0	0	0.0289477
			AB	0.173686	0.651324	0.26013	0	0	0	0.180857
			ED	12.6357	16.5002	11.8975	12.766	11.5067	8.55406	12.31
			IP	0.02058	0.023698	0.017555	0.019852	0.0121136	0.026547	0.0200576
			NE	16.4134	16.37	18.7531	27.4425	2.63872	5.50455	14.5204
			MS	1.98739	2.24792	2.34477	2.30135	0.738168	0.825011	1.74077
